# Supplementary material for: Enhancing the photostability and bioaccessibility of resveratrol using ovalbumin–carboxymethylcellulose nanocomplexes and nanoparticles
Source: Royal Society of Chemistry journal article supplement (doi:10.1039/c8fo00300a), 2018-01-01
Supplement: c8fo00300a1.pdf [file c8fo00300a1.pdf]

# Enhancing photostability and bioaccessibility of resveratrol using ovalbumin-carboxymethylcellulose nanocomplexes and nanoparticles

Wenfei Xiong<sup>a,b</sup>, Cong Ren<sup>a,b</sup>, Jing Li<sup>a,b</sup>, Bin Li<sup>a,b,c\*</sup>

<sup>a</sup> College of Food Science and Technology, Huazhong Agricultural University, Wuhan 430070, Hubei, China

<sup>b</sup> Key Laboratory of Environment Correlative Dietology (Huazhong Agricultural University), Ministry of Education, China

<sup>c</sup> Functional Food Engineering & Technology Research Center of Hubei Province, Wuhan 430068, China

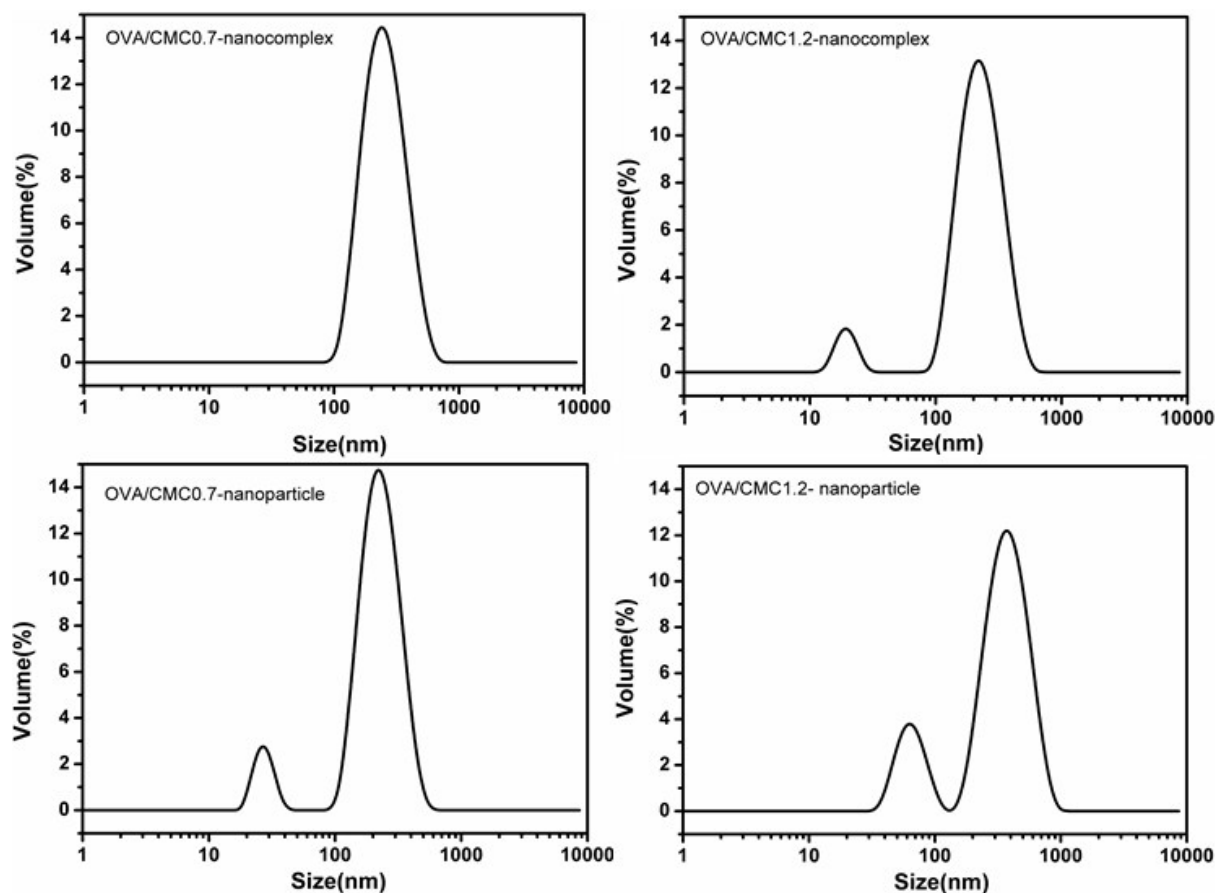

Fig. S1. Particle size distribution curves of OVA/CMC nanocomplexes or nanoparticles.

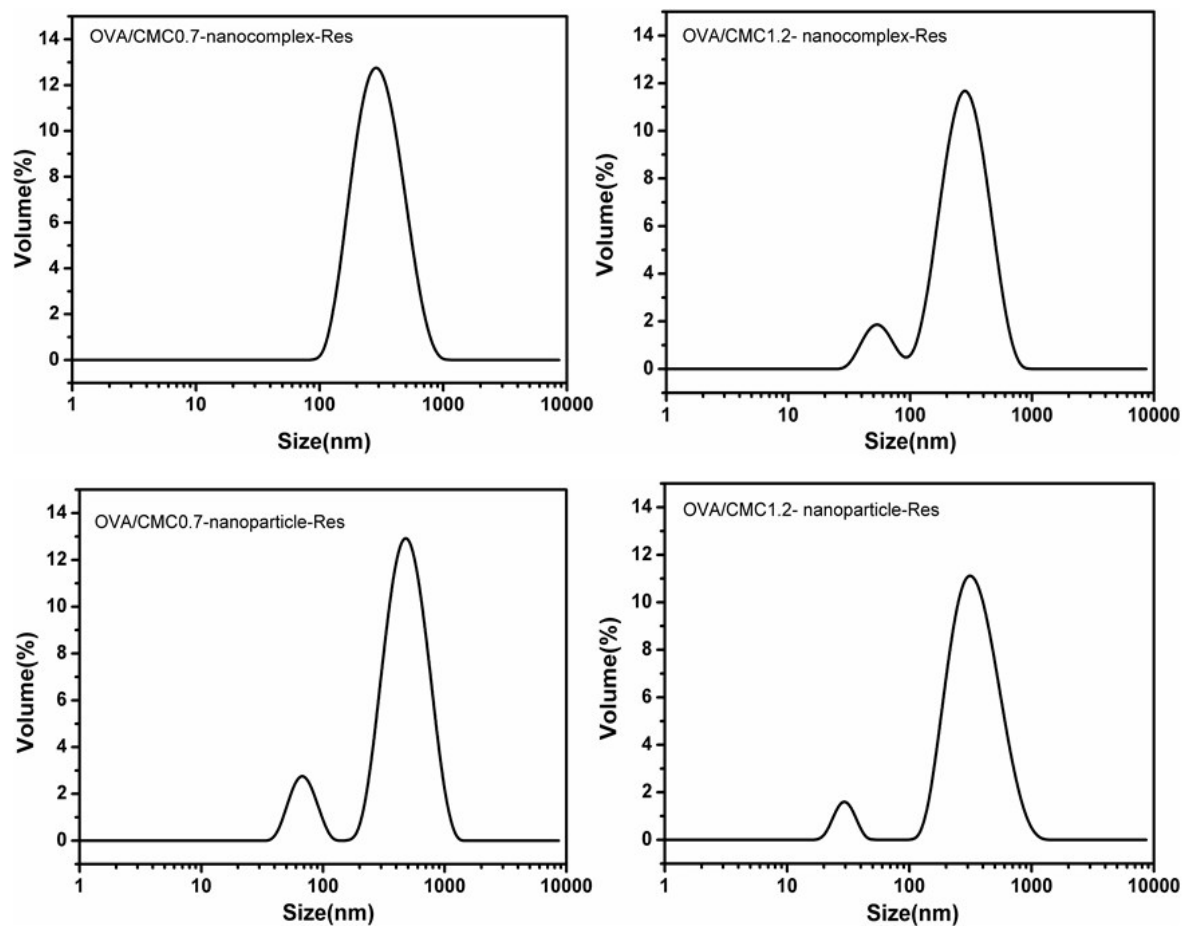

9

10 Fig. S2. Particle size distribution curves of OVA/CMC nanocomplexes or nanoparticles after loading resveratrol.
